# Supplementary material for: Enhancing Photostability of Complex Lead Halides through Modification with Antibacterial Drug Octenidine
Source: MDPI journal article supplement (doi:10.3390/ma17010129), 2023-12-26
Supplement: s1 [file s1]

## Supplementary Materials

### Enhancing photostability of complex lead halides through modification with antibacterial drug octenidine

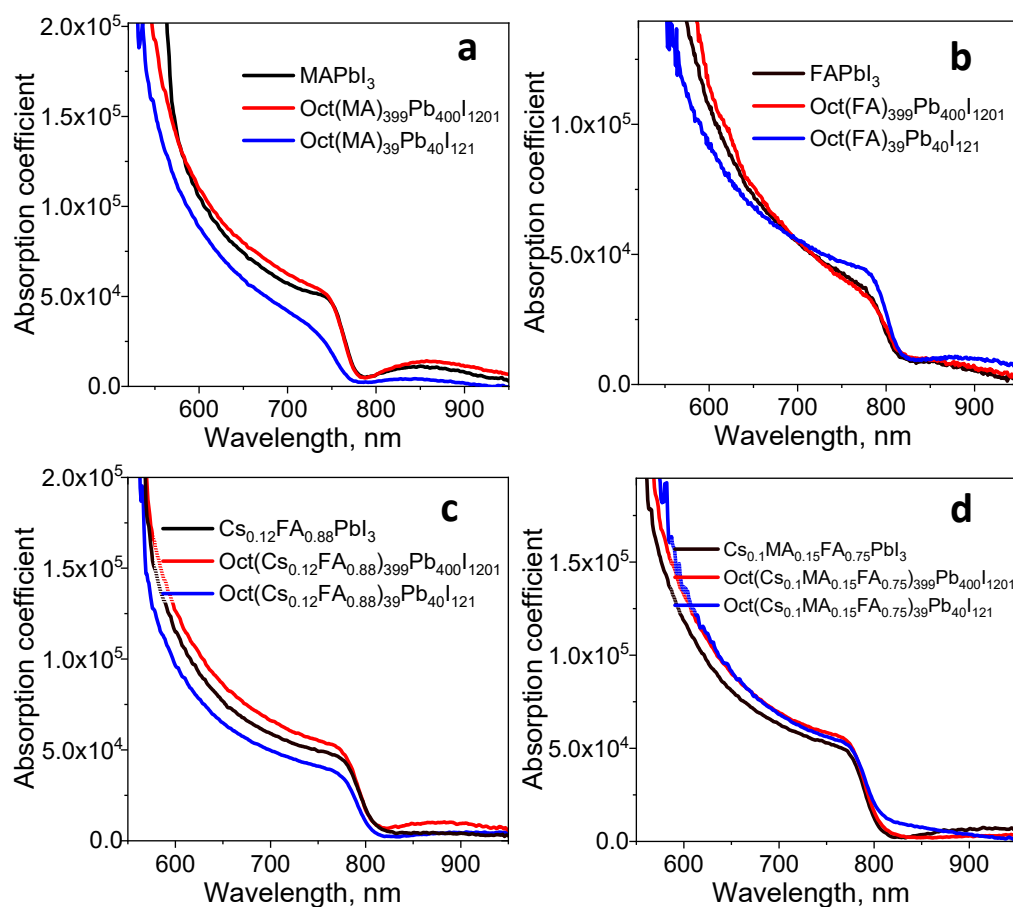

**Figure S1.** Absorption coefficients of the pristine and modified perovskite thin films as a function of the wavelength.

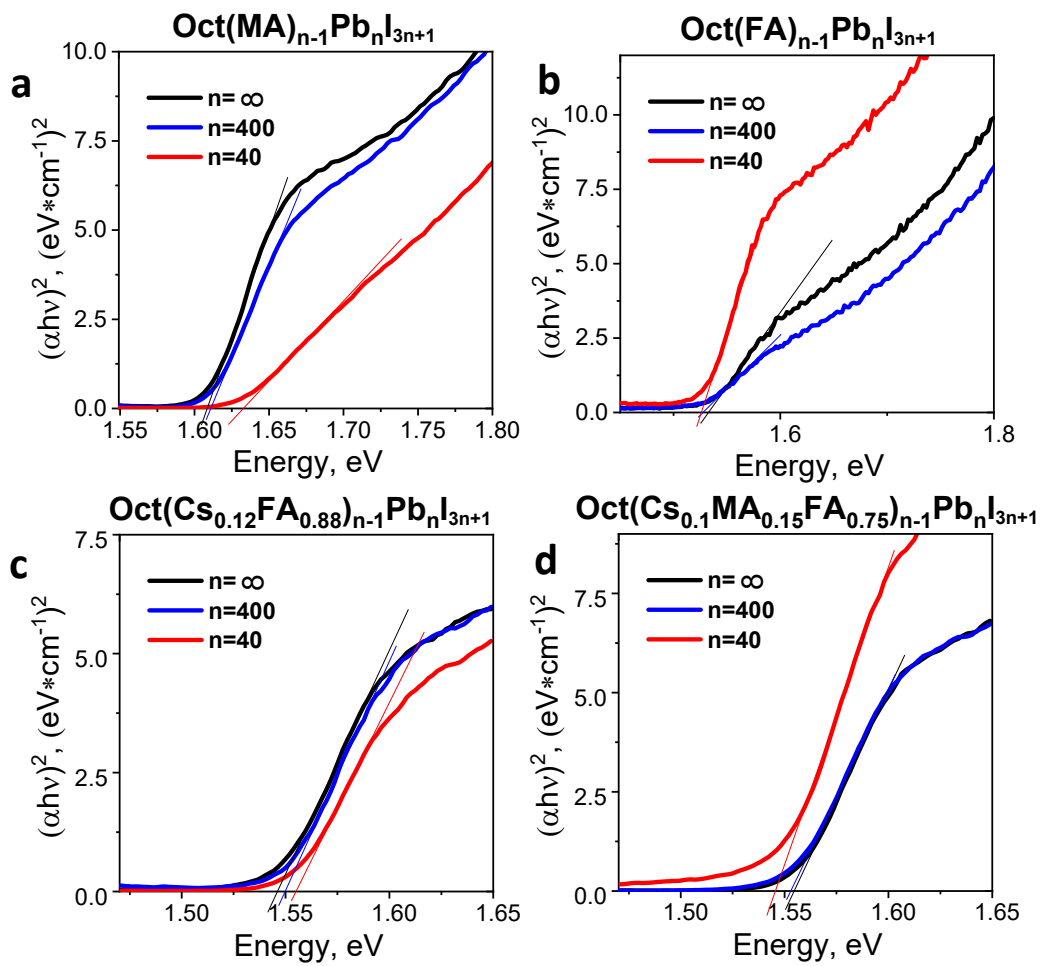

**Figure S2.** Tauc plots for the  $\text{OctA}_{n-1}\text{Pb}_n\text{I}_{3n+1}$  films of various compositions used for  $E_g$  estimation (assuming direct bandgap).

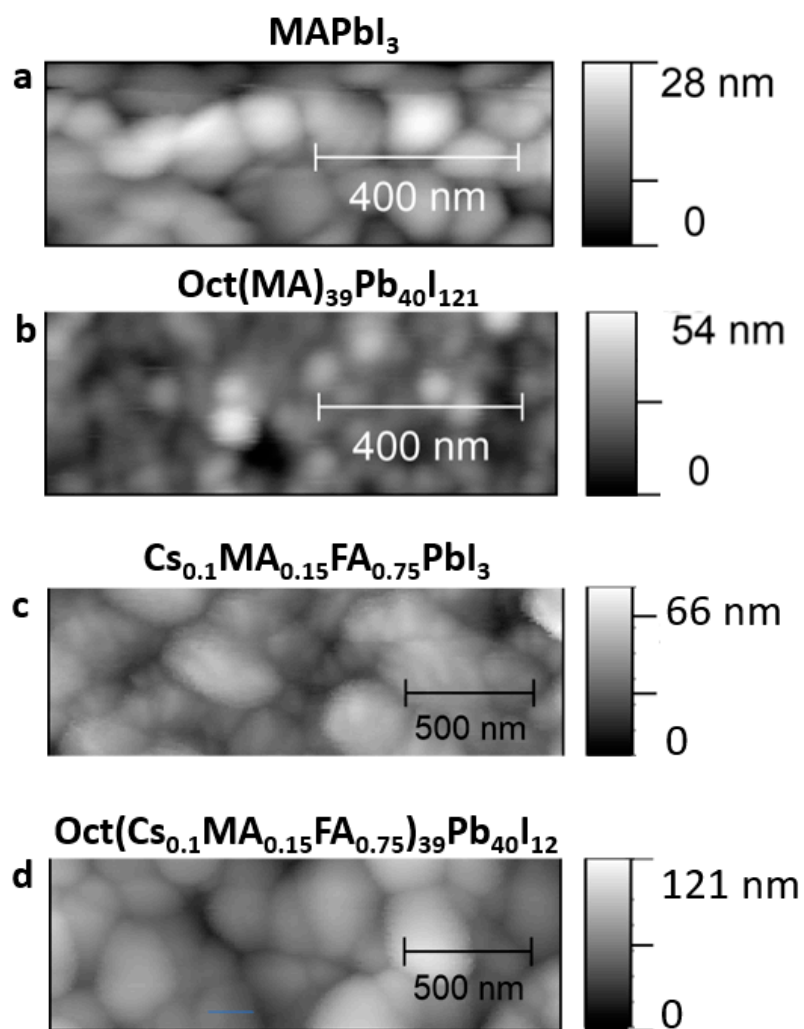

**Figure S3.** Surface morphology of the perovskite films:  $\text{MAPbI}_3$  (a),  $\text{Oct}(\text{MA})_{39}\text{Pb}_{40}\text{I}_{121}$  (b),  $\text{Cs}_{0.1}\text{MA}_{0.15}\text{FA}_{0.75}\text{PbI}_3$  (c), and  $\text{Oct}(\text{Cs}_{0.1}\text{MA}_{0.15}\text{FA}_{0.75})_{39}\text{Pb}_{40}\text{I}_{121}$  (d).

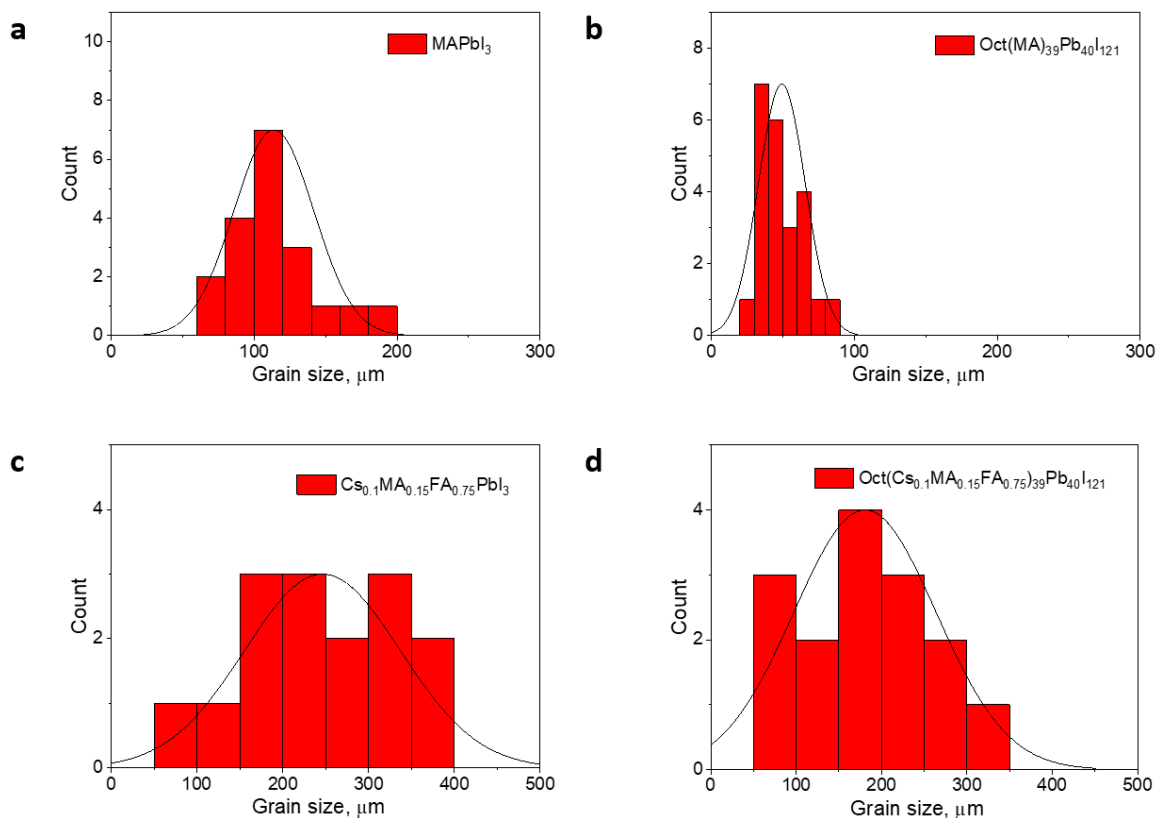

**Figure S4.** Grain size distribution for the pristine  $\text{MAPbI}_3$  (a),  $\text{Cs}_{0.1}\text{MA}_{0.15}\text{FA}_{0.75}\text{PbI}_3$  (c), modified  $\text{Oct(MA)}_{39}\text{Pb}_{40}\text{I}_{121}$  (b), and  $\text{Oct(Cs}_{0.1}\text{MA}_{0.15}\text{FA}_{0.75})_{39}\text{Pb}_{40}\text{I}_{121}$  (d) films.

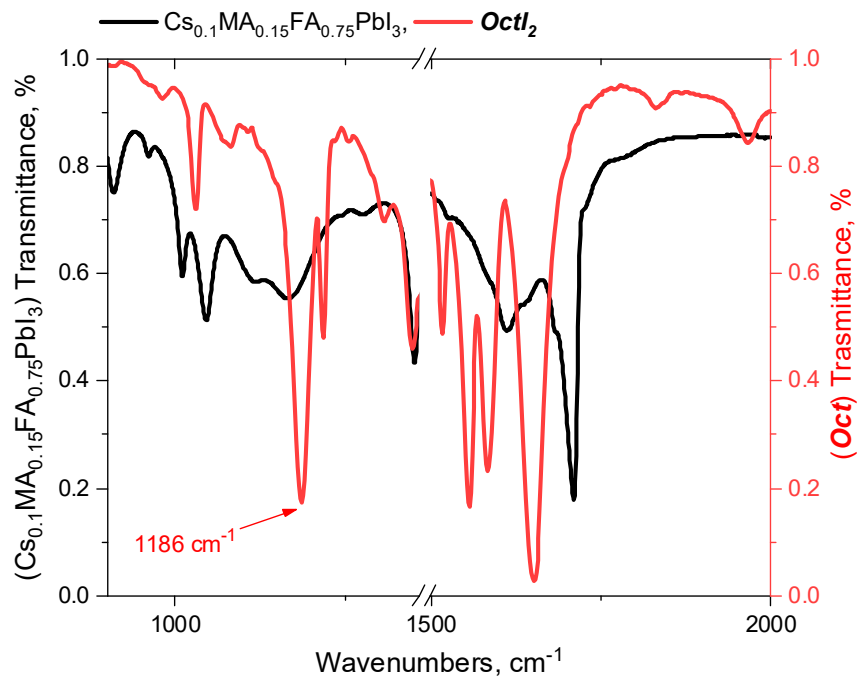

**Figure S5.** FTIR spectrum of the  $\text{Cs}_{0.1}\text{MA}_{0.15}\text{FA}_{0.75}\text{PbI}_3$  and octenidine dihydroiodide powders.

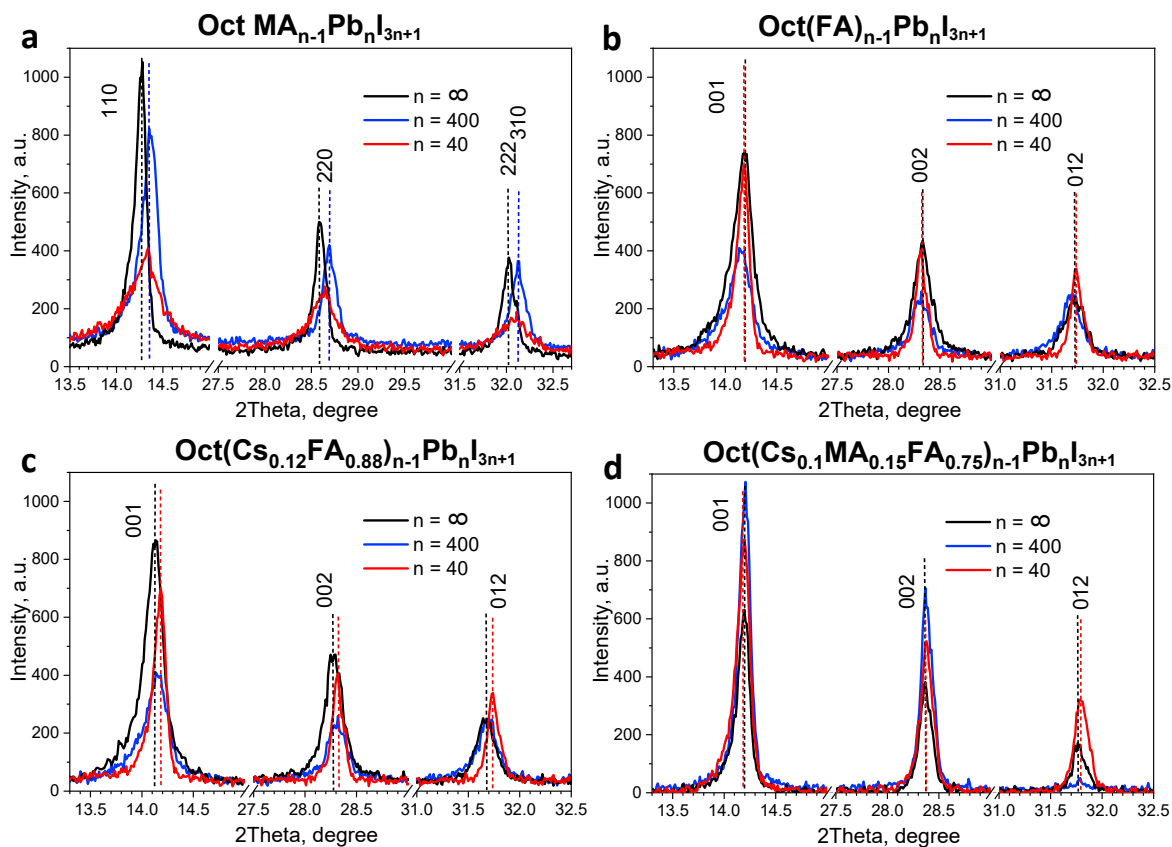

**Figure S6.** The zoomed parts of the diffraction patterns for the Oct(A)<sub>n-1</sub>Pb<sub>n</sub>I<sub>3n+1</sub> films with different OctI<sub>2</sub> loadings compared to the reference APbI<sub>3</sub> samples, where A = MA (a), FA (b), Cs<sub>0.12</sub>FA<sub>0.88</sub> (c), and Cs<sub>0.1</sub>MA<sub>0.15</sub>FA<sub>0.75</sub> (d).

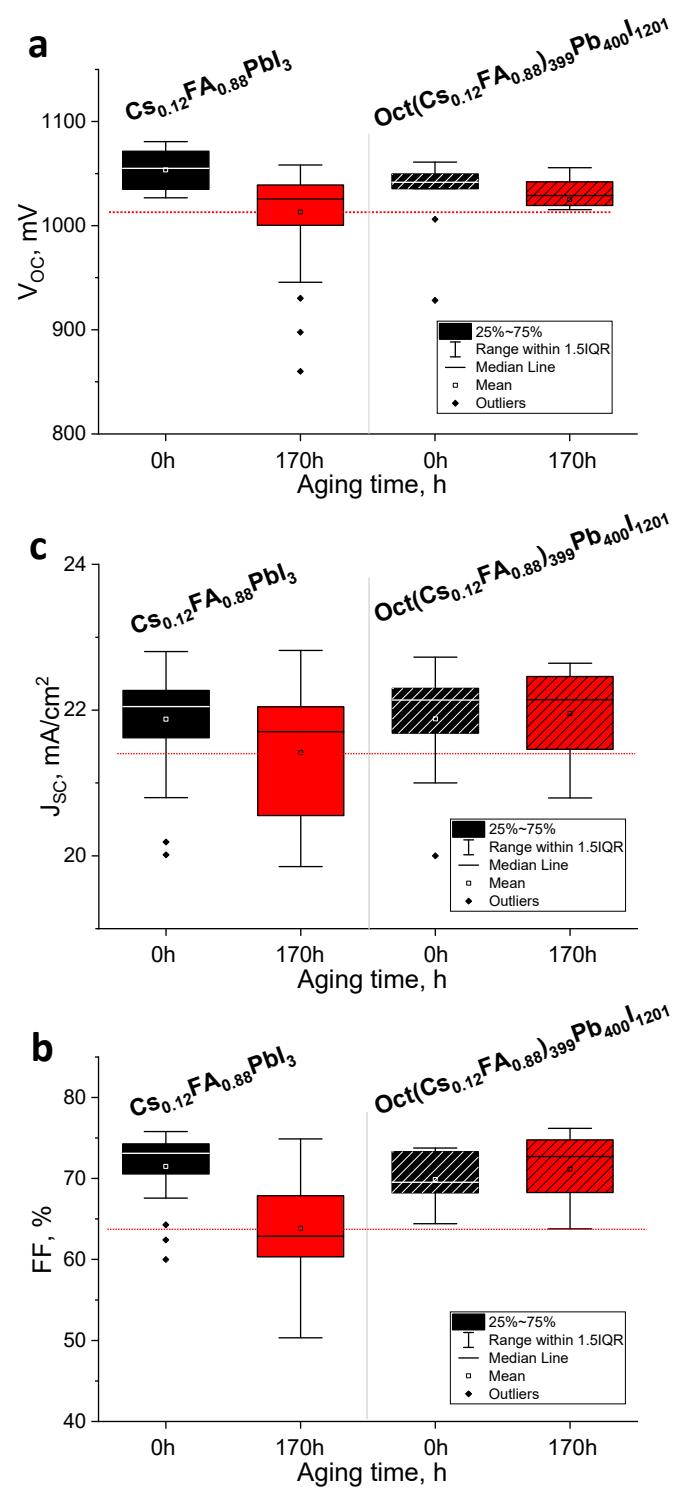

**Figure S7.** The open circuit voltage ( $V_{oc}$ ) (a), short circuit current density ( $J_{sc}$ ) (b), and fill factor values (FF) (c) of the ITO/PTA/Perovskite/PCBM/Al devices based on  $Cs_{0.12}FA_{0.88}PbI_3$  and  $Oct(Cs_{0.12}FA_{0.88})_{399}Pb_{400}I_{1201}$  absorber films with and w/o exposure to light for 170 h (70 mW/cm<sup>2</sup>, T= 38±3°C).

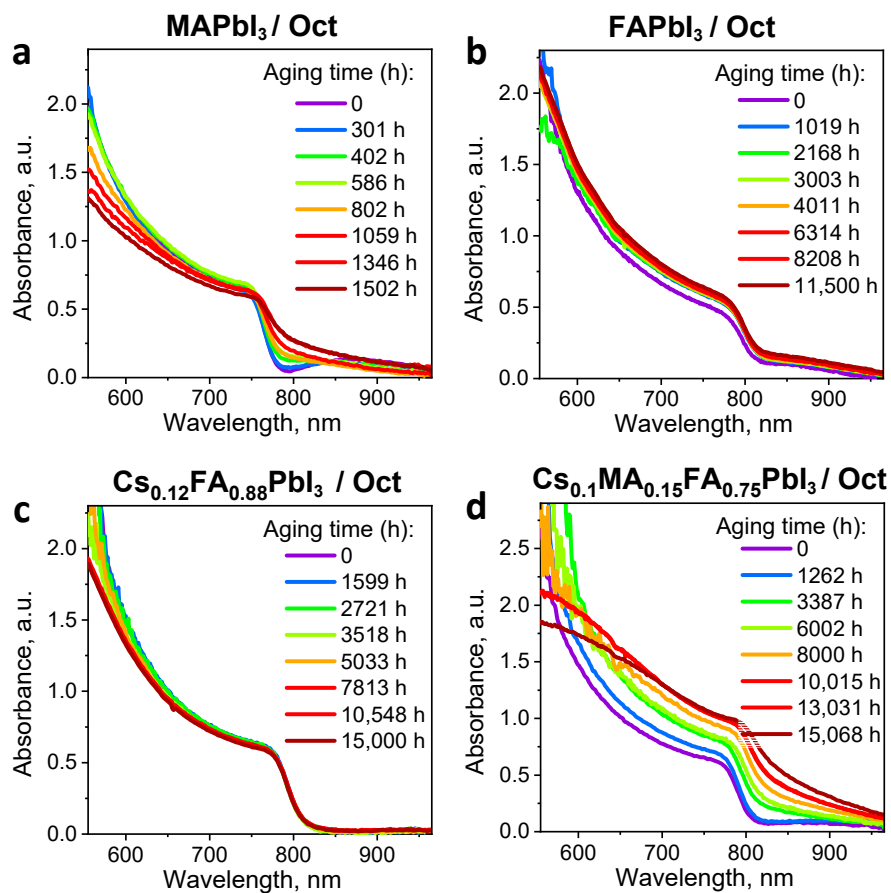

**Figure S8.** The evolution of the UV-Vis spectra of the APbI<sub>3</sub> films modified by *OctI*<sub>2</sub> surface coating upon light exposure for A = MA (a), FA (b), Cs<sub>0.12</sub>FA<sub>0.88</sub> (c), and Cs<sub>0.1</sub>MA<sub>0.15</sub>FA<sub>0.75</sub> (d).

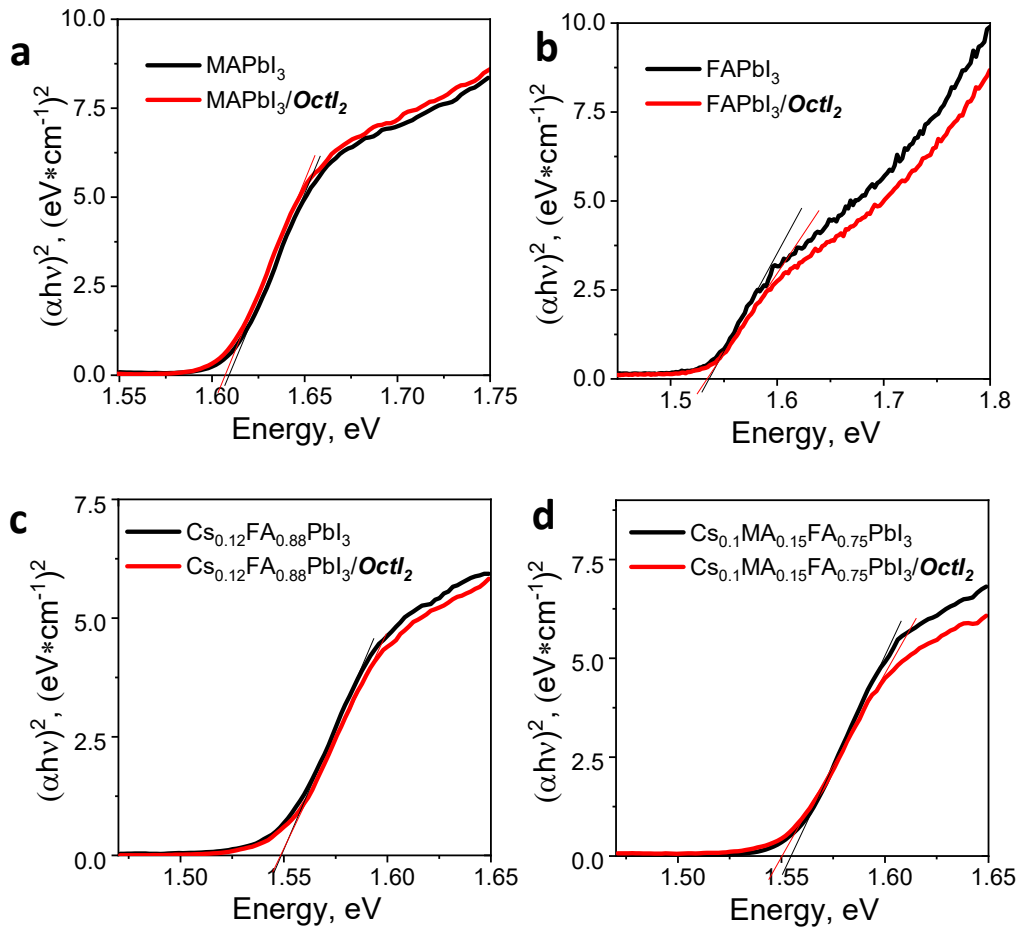

**Figure S9.** Tauc plots for APbI<sub>3</sub> films modified by the *OctI*<sub>2</sub> surface coating used for E<sub>g</sub> estimation (assuming direct bandgap) for A = MA (a), FA (b), Cs<sub>0.12</sub>FA<sub>0.88</sub> (c), and Cs<sub>0.1</sub>MA<sub>0.15</sub>FA<sub>0.75</sub> (d).

**Table S1.** Overview of the relevant reported data on the perovskite solar cells based on the Dion-Jacobson absorber materials.

| Bulk cation or corresponding amine                    | Light absorber                                                                                        | Device structure                                                                                                  | PCE, %       | Aging conditions                       | Aging time / Retained fraction (%) of the initial efficiency | Ref. |
|-------------------------------------------------------|-------------------------------------------------------------------------------------------------------|-------------------------------------------------------------------------------------------------------------------|--------------|----------------------------------------|--------------------------------------------------------------|------|
| Ethylenediamine dihydrochloride (EDACl <sub>2</sub> ) | EDACl <sub>2</sub> / Cs <sub>0.15</sub> FA <sub>0.85</sub> PbI <sub>2.7</sub> Br <sub>0.3</sub> 2D/3D | ITO/SnO <sub>2</sub> /Cs <sub>0.15</sub> FA <sub>0.85</sub> PbI <sub>2.7</sub> Br <sub>0.3</sub> /Spiro-MeOTAD/Ag | <b>19.68</b> | N/A                                    | N/A                                                          | [1]  |
| Ethane-1,2-diammonium iodide (EDAI <sub>2</sub> )     | MA <sub>1-2x</sub> EDA <sub>x</sub> PbI <sub>3</sub> 2D/3D                                            | FTO/c-TiO <sub>2</sub> /Perovskite/spiro-OMeTAD/Au                                                                | <b>17.0</b>  | Light (1 sun), T=50 °C, RH~50%,        | 72h / 75%                                                    | [2]  |
| Ethane-1,2-diammonium iodide (EDAI <sub>2</sub> )     | CsPbI <sub>3</sub> ·xEDAPbI <sub>4</sub>                                                              | FTO/c-TiO <sub>2</sub> /Perovskite/spiro-OMeTAD/Ag                                                                | <b>11.86</b> | Dark, RT, inert atmosphere             | 840 h / 75%                                                  | [3]  |
| Ethane-1,2-diammonium iodide (EDAI <sub>2</sub> )     | EDAI <sub>2</sub> /FASnI <sub>3</sub> 2D/3D                                                           | ITO/PE-DOT:PSS/PSK/C <sub>60</sub> /BCP/Ag                                                                        | <b>8.9</b>   | Dark, RT, ambient air (encapsulated)   | 2000 h / 100%                                                | [4]  |
| N,N'-dimethylethylene-1,2-diammonium iodide           | DEAI <sub>2</sub> /MAPbI <sub>3</sub> 2D/3D                                                           |                                                                                                                   | <b>20.2</b>  | Dark, RT, RH ~60-80 % (unencapsulated) | 720 h / 73.7%                                                | [5]  |
| 1,3-propanediammonium iodide (PRI2)                   | (PR) <sub>2</sub> (FA) <sub>8</sub> Pb <sub>9</sub> I <sub>28</sub>                                   | FTO/c-TiO <sub>2</sub> /Perovskite/spiro-OMeTAD/Au                                                                | <b>12.92</b> | Dark, RT, RH ~80 %                     | 500 h / 50%                                                  | [6]  |



|                                                      |                                                                                                                                                                                               |                                                                  |       |                                                                 |              |      |
|------------------------------------------------------|-----------------------------------------------------------------------------------------------------------------------------------------------------------------------------------------------|------------------------------------------------------------------|-------|-----------------------------------------------------------------|--------------|------|
| 1,4-butanediammonium iodide (BUI2)                   | (BU) <sub>2</sub> (FA) <sub>8</sub> Pb <sub>9</sub> I <sub>28</sub>                                                                                                                           | FTO/c-TiO <sub>2</sub> /Perovskite/spiro-OMeTAD/Au               | 11.71 | Dark, RT, RH ~80 %                                              | 500 h / 30%  |      |
| 1,6-Diaminohexane Dihydrochloride (1,6-DD)           | 1,6-DD /MAPbI <sub>3</sub> 2D/3D                                                                                                                                                              |                                                                  | 17.0  | Dark, ambient air, RH~10-30% (unencapsulated)                   | 384 h / 30%  | [7]  |
| 1,8-octanediammonium iodide (ODAI)                   | 1,8-OD /FAPbI <sub>3</sub> 2D/3D                                                                                                                                                              | (ITO/SnO <sub>2</sub> /perovskite/PCBM/Ag                        | 21.18 | Dark, ambient air (RH~20-40%, RT) (unencapsulated)              | 884 h / 92%  | [8]  |
| 1,8-octanediammonium iodide (ODAI)                   | NH <sub>3</sub> I(CH <sub>2</sub> ) <sub>8</sub> NH <sub>3</sub> I /MAPbI <sub>3</sub> 2D/3D                                                                                                  | ITO/Cu:NiO <sub>x</sub> /perovskite/PCBM/bis-C <sub>60</sub> /Ag | 17.6  | N/A                                                             | N/A          | [9]  |
|                                                      |                                                                                                                                                                                               |                                                                  |       |                                                                 | 1000 h / 65% |      |
|                                                      |                                                                                                                                                                                               |                                                                  |       | Dark, ambient air, RH~65%)                                      | ---          |      |
| 2,2-(ethylenedioxy)bis(ethylammonium iodide) (EDBEI) | (EDBEPbI <sub>4</sub> ) <sub>0.03</sub> [Cs <sub>0.05</sub> (FA <sub>0.83</sub> MA <sub>0.17</sub> ) <sub>0.95</sub> Pb(I <sub>0.83</sub> Br <sub>0.17</sub> ) <sub>3</sub> ] <sub>0.97</sub> | ITO/c-TiO <sub>2</sub> /perovskite/Spiro-OMeTAD/Au               | 21.6  | Light (1 sun), MPPT, N <sub>2</sub> atmosphere (unencapsulated) | 500 h / 95%  | [10] |
|                                                      |                                                                                                                                                                                               |                                                                  |       | ---                                                             | ---          |      |
|                                                      |                                                                                                                                                                                               |                                                                  |       | Dark, ambient air, RH~40-50%) (encapsulated)                    | 3000 h / 95% |      |
| p-phenylenediammonium (PPE)                          | PPE /Cs <sub>0.06</sub> FA <sub>0.79</sub> MA <sub>0.15</sub> PbI <sub>3</sub> 2.55Br <sub>0.45</sub> 2D/3D                                                                                   | ITO/c-TiO <sub>2</sub> /perovskite/Spiro-OMeTAD/Au               | 16.03 | NA                                                              | NA           | [11] |
|                                                      |                                                                                                                                                                                               |                                                                  |       |                                                                 | 240 h / 100% |      |
|                                                      |                                                                                                                                                                                               |                                                                  |       | Light (1 sun), N <sub>2</sub> atmosphere, RT (unencapsulated)   | ---          |      |
| Bidentate ligand 2,2-bipyridine (Bpy)                | Bpy /FA <sub>0.88</sub> Cs <sub>0.12</sub> PbI <sub>3</sub> 2D/3D                                                                                                                             | ITO/c-TiO <sub>2</sub> /perovskite/Spiro-OMeTAD/Au               | 18.6  | Dark, inert atmosphere, T = 85 °C (unencapsulated)              | --           | [12] |
|                                                      |                                                                                                                                                                                               |                                                                  |       | ---                                                             | 196 h / 77%  |      |
|                                                      |                                                                                                                                                                                               |                                                                  |       | Dark, ambient air, RH~50%, RT (unencapsulated)                  | --           |      |
|                                                      |                                                                                                                                                                                               |                                                                  |       |                                                                 | 670 h / 43%  |      |
| Pyrazine                                             |                                                                                                                                                                                               |                                                                  | 20.58 | Dark, ambient air, RH~55%, RT                                   | 50 h / 90%   | [13] |
| imidazolium iodide                                   | imidazolium iodide / MAPbI <sub>3</sub> 2D/3D                                                                                                                                                 |                                                                  | 19.9  | Light, MPPT (unencapsulated)                                    | 300 h / 90%  | [14] |
| 2-Methylimidazole                                    | (FAPbI <sub>3</sub> ) <sub>1-x</sub> (MAPbBr <sub>3</sub> ) <sub>x</sub> 2D/3D                                                                                                                |                                                                  | 19.45 | N/A                                                             | N/A          | [15] |
| (aminomethyl)pyridinium (3AMPY)                      | (3AMP)(MA) <sub>3</sub> Pb <sub>4</sub> I <sub>13</sub>                                                                                                                                       | FTO/PEDOT:PSS/perovskite/C <sub>60</sub> /BCP/Ag                 | 7.32  | N/A                                                             | N/A          | [16] |

|                                               |                                                                                                                              |                                                      |       |                                                                                                                                                            |                                            |      |
|-----------------------------------------------|------------------------------------------------------------------------------------------------------------------------------|------------------------------------------------------|-------|------------------------------------------------------------------------------------------------------------------------------------------------------------|--------------------------------------------|------|
| (aminomethyl)pyridinium (3AMPY)               | (3AMP)(MA <sub>0.75</sub> FA <sub>0.25</sub> ) <sub>3</sub> Pb <sub>4</sub> I <sub>13</sub>                                  | FTO/PEDOT:PSS/perovskite/C <sub>60</sub> /BCP/Ag     | 12.04 | Light in ambient air (50–70% RH) (unencapsulated)                                                                                                          | 48 h / 22 %                                | [17] |
| 3-(aminomethyl)pyridinium (3AMPY)             | (3AMP)(MA <sub>0.75</sub> FA <sub>0.25</sub> ) <sub>3</sub> Pb <sub>4</sub> I <sub>13</sub>                                  | ITO/PTAA/PFN/perovskite/PC <sub>61</sub> CM/BCP/Ag   | 16.25 | Dark, ambient atmosphere (25 ± 5% RH)<br>(45 ± 5% RH) (unencapsulated)                                                                                     | 2304 h / 90%<br>840 h / 80%                | [18] |
| 3-(aminomethyl)pyridinium (3AMPY)             | 3AMPY(MA) <sub>3</sub> Pb <sub>4</sub> I <sub>13</sub>                                                                       | FTO/PEDOT:PSS/perovskite/C <sub>60</sub> /BCP/Ag     | 9.20  | N/A                                                                                                                                                        | N/A                                        | [19] |
| 4-aminomethylpyridinium (4AMPY)               | (4AMP)(MA) <sub>2</sub> Pb <sub>3</sub> I <sub>10</sub>                                                                      | FTO/PEDOT:PSS/perovskite/C <sub>60</sub> /BCP/Ag     | 3.67  | N/A                                                                                                                                                        | N/A                                        | [16] |
| 4-aminomethylpyridinium (4AMP)                | (4AMP)(FA) <sub>3</sub> Sn <sub>4</sub> I <sub>13</sub>                                                                      | FTO/TiO <sub>2</sub> /ZrO <sub>2</sub> /perovskite/C | 4.22  | 1-sun illumination N <sub>2</sub> atmosphere, T=45 °C (unencapsulated)                                                                                     | 100 h / 91%                                | [17] |
| 3-(aminomethyl)pyridinium (3AMP)              | 3AMP/(MA <sub>0.5</sub> FA <sub>0.5</sub> ) <sub>3</sub> (Pb <sub>0.5</sub> Sn <sub>0.5</sub> ) <sub>4</sub> I <sub>13</sub> | ITO/PEDOT:PSS/perovskite/PCBM/BCP/Ag                 | 20.09 | Continuous illumination in ambient air (20–50% RH, RT) (encapsulated)                                                                                      | 100 h / 73.2%                              | [18] |
| 4-(aminomethyl)pyridinium (4AMPY)             | (4AMPY)(MA) <sub>3</sub> Pb <sub>4</sub> I <sub>13</sub>                                                                     | FTO/PEDOT:PSS/perovskite/C <sub>60</sub> /BCP/Ag     | 5.69  | N/A                                                                                                                                                        | N/A                                        | [19] |
| 2,5-thiophenedimethylammonium (ThDMA)         | (ThDMA)MA <sub>4</sub> Pb <sub>5</sub> I <sub>16</sub>                                                                       | ITO/PEDOT: PSS/perovskite/PCBM/BCP/Ag                | 15.75 | Dark, N <sub>2</sub> atmosphere, RT<br>Continuous illumination in N <sub>2</sub> atmosphere,<br>Dark, T=80 °C, N <sub>2</sub> atmosphere. (unencapsulated) | 1655 h / >95%<br>668 h / 88%<br>...h / 90% | [20] |
| 3-(dimethylammonium)-1-propylammonium (DMAPA) | (DMAPA)PbI <sub>4</sub>                                                                                                      | FTO/TiO <sub>2</sub> /perovskite/spiro-OMeTAD/Au     | 3.85  | N/A                                                                                                                                                        | N/A                                        | [21] |
| 3-(dimethylammonium)-1-propylammonium (DMAPA) | (DMAPA)MA <sub>3</sub> Pb <sub>4</sub> I <sub>13</sub>                                                                       | FTO/TiO <sub>2</sub> /perovskite/spiro-OMeTAD/Au     | 15.16 | Dark, T=85 °C in air;<br>Continuous illumination (unencapsulated)                                                                                          | 1000 h / >90%<br>300 h / 80%               | [21] |
| 3-(dimethylammonium)-1-propylammonium (DMAPA) | (DMAPA)MA <sub>4</sub> Pb <sub>5</sub> I <sub>16</sub>                                                                       | FTO/TiO <sub>2</sub> /perovskite/spiro-OMeTAD/Au     | 12.41 | N/A                                                                                                                                                        | N/A                                        | [21] |
| 1,3-propanediammonium                         | (PDA)MAPb <sub>2</sub> I <sub>7</sub>                                                                                        | FTO/TiO <sub>2</sub> /perovskite/Spiro-OMeTAD/Au     | 1.27  | N/A                                                                                                                                                        | N/A                                        | [22] |
| 1,3-propanediammonium                         | (PDA)MA <sub>2</sub> Pb <sub>3</sub> I <sub>10</sub>                                                                         | FTO/TiO <sub>2</sub> /perovskite/Spiro-OMeTAD/Au     | 9.10  | N/A                                                                                                                                                        |                                            | [22] |

|                        |                                                                                          |                                                                         |       |                                                                                                                                                                                                                                            |                                            |      |
|------------------------|------------------------------------------------------------------------------------------|-------------------------------------------------------------------------|-------|--------------------------------------------------------------------------------------------------------------------------------------------------------------------------------------------------------------------------------------------|--------------------------------------------|------|
| 1,3-propanediammonium  | (PDA)MA <sub>3</sub> Pb <sub>4</sub> I <sub>13</sub>                                     | FTO/TiO <sub>2</sub> /perovskite/Spiro-OMeTAD/Au                        | 13.3  | >95% under various harsh environmental stresses,<br><br>including in ambient air with 40–70% RH after 4000 h,<br><br>in damp heat condition with 85 °C and 85% RH after 168 h, and in continuous illumination for 3000 h. (unencapsulated) |                                            | [22] |
| 1,3-propanediammonium  | (PDA)MA <sub>2</sub> Pb <sub>3</sub> I <sub>10</sub>                                     | ITO/PEDOT:PSS/perovskite/C <sub>60</sub> /BCP/Ag                        | 9.0   | N/A                                                                                                                                                                                                                                        | N/A                                        | [23] |
| 1,3-propanediammonium  | (PDA)FA <sub>2</sub> Pb <sub>3</sub> I <sub>10</sub>                                     | ITO/SnO <sub>2</sub> /perovskite/Spiro-OMeTAD/Ag                        | 8.45  | Dark, T= 85 °C in the N <sub>2</sub> atmosphere (unencapsulated)                                                                                                                                                                           | 100 h / 50%                                | [23] |
| 1,3-propanediammonium  | (PDA)FA <sub>3</sub> Pb <sub>4</sub> I <sub>13</sub>                                     | ITO/SnO <sub>2</sub> /perovskite/Spiro-OMeTAD/Ag                        | 13.8  | Dark, T= 85 °C in the N <sub>2</sub> atmosphere (unencapsulated)<br><br>Dark, under ambient condition (30–40% RH, RT) (unencapsulated)                                                                                                     | 1000 h / 85%<br><br>540 h / 85%            | [23] |
| propane-1,3-diammonium | (PDA)MA <sub>2</sub> Pb <sub>3</sub> I <sub>10</sub>                                     | ITO/PEDOT:PSS/perovskite/PC <sub>61</sub> BM/BCP/Cu                     | 11.3  | N/A                                                                                                                                                                                                                                        | N/A                                        | [23] |
| 1,3-propanediamine     | PDAMA <sub>4</sub> Pb <sub>5</sub> I <sub>16</sub>                                       | ITO/PEDOT:PSS/perovskite/PC <sub>60</sub> BM/LiF/Al                     | 14.16 | Dark, under ambient condition (45% RH, RT) (unencapsulated)                                                                                                                                                                                | 480 h / 30%                                | [24] |
| 1,4-butanediammonium   | BDAPbI <sub>4</sub>                                                                      | FTO/TiO <sub>2</sub> /perovskite/Spiro-OMeTAD/Ag                        | 1.08  | Dark, under ambient condition                                                                                                                                                                                                              | 96 h / 73.9%                               | [25] |
| 1,4-butanediammonium   | BDAPbI <sub>4</sub>                                                                      | FTO/c-TiO <sub>2</sub> /mp-TiO <sub>2</sub> /perovskite/Spiro-OMeTAD/Au | 1.1   | N/A                                                                                                                                                                                                                                        | N/A                                        | [26] |
| 1,4-butanediammonium   | BDAMA <sub>4</sub> Pb <sub>5</sub> I <sub>16</sub>                                       | ITO/PTAA/perovskite/PCBM/BCP/Ag                                         | 14.53 | Dark, (50 ± 5% RH, RT) (encapsulated)                                                                                                                                                                                                      | 900 h / 85%                                | [27] |
| 1,4-butanediammonium   | BDAMA <sub>4</sub> Pb <sub>5</sub> I <sub>16</sub>                                       | ITO/PEDOT:PSS/perovskite/PC <sub>60</sub> BM/LiF/Al                     | 16.38 | Dark, ambient air (45% RH, RT) (unencapsulated)                                                                                                                                                                                            | 480 h / 80%                                | [24] |
| 1,4-butanediammonium   | BDAMA <sub>3</sub> Pb <sub>5</sub> I <sub>16</sub>                                       | ITO/PEDOT:PSS/perovskite/PC <sub>60</sub> BM/LiF/Au                     | 17.91 | Dark, ambient air (60% RH, RT)<br><br>Light, (unencapsulated)                                                                                                                                                                              | 1182h / 84%<br><br>298 h / 90%             | [28] |
| 1,4-butanediammonium   | (BDA)(Cs <sub>0.1</sub> FA <sub>0.9</sub> ) <sub>4</sub> Pb <sub>5</sub> I <sub>16</sub> | FTO/TiO <sub>2</sub> /perovskite/Spiro-OMeTAD/Ag                        | 18.2  | Dark, 80% RH (unencapsulated)<br><br>Dark, T= 85 °C (unencapsulated)                                                                                                                                                                       | 800 h / 100%<br>800 h / 80%<br>800 h / 90% | [29] |

|                                            |                                                                                            |                                                     |       |                                             |                                               |  |      |
|--------------------------------------------|--------------------------------------------------------------------------------------------|-----------------------------------------------------|-------|---------------------------------------------|-----------------------------------------------|--|------|
|                                            |                                                                                            |                                                     |       |                                             | Continuous illumination at MPP (encapsulated) |  |      |
| 1,4-butanediammonium                       | (BDA)FA <sub>2</sub> Sn <sub>3</sub> I <sub>10</sub>                                       | ITO/PEDOT:PSS/perovskite/PCBM/Ag                    | 6.43  | Dark, N <sub>2</sub> environment, RT        | 1000 h / 92%                                  |  |      |
|                                            |                                                                                            |                                                     |       | Dark, (40% RH, RT)                          | 200 h / 89%                                   |  | [30] |
|                                            |                                                                                            |                                                     |       | Dark, T = 100 °C (unencapsulated)           | 50 h / 82%                                    |  |      |
| 1,4-butanediammonium                       | (BDA)MA <sub>3</sub> Pb <sub>4</sub> I <sub>13</sub>                                       | (PEDOT:PSS/ perovskite/ bathocuproine/Ag)           | 12.81 | N/A                                         | N/A                                           |  | [31] |
| 1,4-butanediammonium                       | (BDA)(MA <sub>0.07</sub> FA <sub>0.93</sub> ) <sub>4</sub> Pb <sub>5</sub> I <sub>16</sub> | ITO/SnO <sub>2</sub> /Perovskite/Spiro-OMeTAD/Au    | 19.55 | N/A                                         | N/A                                           |  | [32] |
| 1,4-butanediammonium                       | (BDA)FA <sub>4</sub> Pb <sub>5</sub> I <sub>16-x</sub> Br <sub>x</sub>                     | ITO/SnO <sub>2</sub> /perovskite/Spiro-OMeTAD/Au    | 16.75 | Dark, 15–20% RH,                            | 1600 h / 93%                                  |  |      |
|                                            |                                                                                            |                                                     |       | Dark, T = 60 °C                             | 400 h / 91%                                   |  | [33] |
| (4F-PhDMA)                                 | (4F-PhDMA)(MA) <sub>3</sub> Pb <sub>4</sub> I <sub>13</sub>                                | ITO/PEDOT:PSS/Perovskite/PCBM/BCP/Ag                | 17.37 | N/A                                         | N/A                                           |  | [34] |
| Pentamethylenediamine (PeDA)               | PeDAMA <sub>4</sub> Pb <sub>5</sub> I <sub>16</sub>                                        | ITO/PEDOT:PSS/perovskite/PC <sub>60</sub> BM/LiF/Al | 12.95 | Dark, ambient air (45% RH) (unencapsulated) | 480 h / ~100%                                 |  | [24] |
| 1,6-diaminohexane dihydroiodide            | HDAPbI <sub>4</sub>                                                                        | FTO/TiO <sub>2</sub> /perovskite/Spiro-OMeTAD/Ag    | 0.592 | Dark, ambient condition                     | 96 h / 57.4%                                  |  | [25] |
|                                            |                                                                                            |                                                     |       | Dark, 50–60% RH                             | 1248 h / 41.3%                                |  |      |
| 1,6-diaminohexane dihydroiodide            | HDAMA <sub>3</sub> Pb <sub>4</sub> I <sub>13</sub>                                         | ITO/SnO <sub>2</sub> /perovskite/Spiro-OMeTAD/Au    | 7.35  | Continuous illumination at MPP              | 4.5 h / 69.6%                                 |  |      |
|                                            |                                                                                            |                                                     |       | Dark, T = 60 °C                             | 68h / 60.2%                                   |  | [35] |
|                                            |                                                                                            |                                                     |       | Dark, T = 70 °C (encapsulated).             | 68 h / 54.9%                                  |  |      |
| 1,6-diaminohexane dihydroiodide            | HDAMA <sub>4</sub> Pb <sub>5</sub> I <sub>16</sub>                                         | ITO/PEDOT:PSS/perovskite/PC <sub>60</sub> BM/LiF/Al | 10.55 | Dark, ambient air (45% RH)                  | 480 h / 60%                                   |  | [24] |
| 1,8-diaminooctane dihydroiodide            | ODAPbI <sub>4</sub>                                                                        | FTO/TiO <sub>2</sub> /perovskite/Spiro-OMeTAD/Ag    | 0.01  | N/A                                         | N/A                                           |  | [25] |
| TTDMA                                      | (TTDMA)(MA) <sub>3</sub> Pb <sub>4</sub> I <sub>13</sub>                                   | ITO/PEDOT:PSS/Perovskite/PCBM/BCP/Ag                | 18.82 | Dark, N <sub>2</sub>                        | 4400 h / 99%                                  |  | [36] |
| trans-1,4-cyclohexanediamine dihydroiodide | (CHDA)PbI <sub>4</sub>                                                                     | FTO/SnO <sub>2</sub> /perovskite/Spiro-OMeTAD/Au    | 0.52  | N/A                                         | N/A                                           |  | [35] |
| trans-1,4-cyclohexanediamine dihydroiodide | (CHDA)MAPb <sub>2</sub> I <sub>7</sub>                                                     | FTO/SnO <sub>2</sub> /perovskite/Spiro-OMeTAD/Au    | 2.89  | N/A                                         | N/A                                           |  | [35] |
| trans-1,4-cyclohexanediamine dihydroiodide | (CHDA)MA <sub>2</sub> Pb <sub>3</sub> I <sub>10</sub>                                      | FTO/SnO <sub>2</sub> /perovskite/Spiro-OMeTAD/Au    | 6.2   | N/A                                         | N/A                                           |  | [35] |
| trans-1,4-cyclohexanediamine dihydroiodide | (CHDA)MA <sub>3</sub> Pb <sub>4</sub> I <sub>13</sub>                                      | ITO/SnO <sub>2</sub> /perovskite/Spiro-OMeTAD/Au    | 15.01 | Dark, (50–60% RH)                           | 1248 h / 94.7%                                |  |      |
|                                            |                                                                                            |                                                     |       | Continuous illumination at MPP              | 4.5h / 80.7%                                  |  | [35] |

|                                            |                                                                                                                                                      |                                                            |      |                                                                                                     |              |      |
|--------------------------------------------|------------------------------------------------------------------------------------------------------------------------------------------------------|------------------------------------------------------------|------|-----------------------------------------------------------------------------------------------------|--------------|------|
|                                            |                                                                                                                                                      |                                                            |      | Dark, T= 60 °C                                                                                      | 68h / 96.5%  |      |
|                                            |                                                                                                                                                      |                                                            |      |                                                                                                     | 68h / 74.4%  |      |
|                                            |                                                                                                                                                      |                                                            |      | Dark, T= 60 °C (encapsulated).                                                                      |              |      |
| p-phenylenediamine dihydroiodide           | (PPD)(MA) <sub>2</sub> Pb <sub>3</sub> I <sub>10p</sub>                                                                                              | ITO/PEDOT:PSS/perovskite/PC <sub>61</sub> BM/BCP/Cu        | 12.3 | N/A                                                                                                 | N/A          | [37] |
| 1,4- phenylenedimethylammonium             | (PDMA)PbI <sub>4</sub>                                                                                                                               | FTO/c-TiO <sub>2</sub> /mp-TiO <sub>2</sub> /perovskite    | 0.91 | N/A                                                                                                 | N/A          | [38] |
|                                            |                                                                                                                                                      | /Spiro-OMeTAD/Au                                           |      |                                                                                                     |              |      |
| 1,4- phenylenedimethylammonium             | (PDMA)FAPb <sub>2</sub> I <sub>7</sub>                                                                                                               | FTO/c-TiO <sub>2</sub> /mp-TiO <sub>2</sub> /perovskite    | 2.91 | N/A                                                                                                 | N/A          | [38] |
|                                            |                                                                                                                                                      | /Spiro-OMeTAD/Au                                           |      |                                                                                                     |              |      |
| 1,4- phenylenedimethylammonium             | (PDMA)FA <sub>2</sub> Pb <sub>3</sub> I <sub>10</sub>                                                                                                | FTO/c-TiO <sub>2</sub> /mp-TiO <sub>2</sub> /perovskite    | 7.11 | Dark, ambient air (30–50% RH, RT)                                                                   | 1440 h / 85% | [38] |
|                                            |                                                                                                                                                      | /Spiro-OMeTAD/Au                                           |      | MPP tracking under continuous illumination, T = 60 °C in N <sub>2</sub> atmosphere (unencapsulated) | 500 h / 60%  |      |
| 1,4- phenylenedimethylammonium             | (PDMA)(MA) <sub>2</sub> Pb <sub>3</sub> I <sub>10</sub>                                                                                              | ITO/PEDOT:PSS/perovskite/PC <sub>61</sub> BM/BCP/Cu        | 15.6 | MPP tracking under continuous illumination, N <sub>2</sub> atmosphere                               | 700 h / 90%  | [37] |
|                                            |                                                                                                                                                      |                                                            |      | Dark, N <sub>2</sub> atmosphere. (unencapsulated)                                                   | 1500 h / 90% |      |
| 1,4- phenylenedimethylammonium             | (PDMA)FA <sub>3</sub> Pb <sub>4</sub> I <sub>13</sub>                                                                                                | FTO/c-TiO <sub>2</sub> /mp-TiO <sub>2</sub> /perovskite    | 6.52 | N/A                                                                                                 | N/A          | [38] |
|                                            |                                                                                                                                                      | /Spiro-OMeTAD/Au                                           |      |                                                                                                     |              |      |
| 1,4- phenylenedimethylammonium             | (PDMA)(Cs <sub>0.05</sub> MA <sub>0.15</sub> FA <sub>0.8</sub> ) <sub>9</sub> Pb <sub>10</sub> (I <sub>0.93</sub> Br <sub>0.07</sub> ) <sub>3</sub>  | FTO/c-TiO <sub>2</sub> /mp-TiO <sub>2</sub> /perovskite    | 15.6 | Dark, ambient air (20–50% RH) . (unencapsulated)                                                    | 84 h / 220%  | [37] |
|                                            |                                                                                                                                                      | /Spiro-OMeTAD/Au                                           |      |                                                                                                     |              |      |
| 1,4-benzenedimethylammonium iodide (BzDAI) | (BzDA)-(Cs <sub>0.05</sub> MA <sub>0.15</sub> FA <sub>0.8</sub> ) <sub>9</sub> Pb <sub>10</sub> (I <sub>0.93</sub> Br <sub>0.07</sub> ) <sub>3</sub> | FTO/c-TiO <sub>2</sub> /mp-TiO <sub>2</sub> /perovskite    | 15.6 | Dark, ambient air (50% RH) (unencapsulated)                                                         | 160 h / 60%  | [39] |
|                                            |                                                                                                                                                      | /Spiro-OMeTAD/Au                                           |      |                                                                                                     |              |      |
| N-(3-aminopropyl)-2-pyrrolidinone (NAP)    | NAP/MASn <sub>0.5</sub> Pb <sub>0.5</sub> I <sub>x</sub> C <sub>1</sub>                                                                              | ITO/PEDOT:PSS/perovskite/PC <sub>61</sub> BM/Bhen-NaDPO/Ag | 13.4 | Dark, ambient conditions (RH 30 ± 5%) (unencapsulated)                                              | 720 h / 90%  | [40] |
|                                            | I <sub>3</sub>                                                                                                                                       |                                                            |      |                                                                                                     |              |      |
|                                            | 2D/3D                                                                                                                                                |                                                            |      |                                                                                                     |              |      |

**Table S2.** Experimental E<sub>g</sub> values and the absorption edge (in brackets) for the OctA<sub>n-1</sub>Pb<sub>n</sub>I<sub>3n+1</sub> films of various compositions obtained from the corresponding Tauc plots.

| Perovskite composition                                                                                         | E <sub>g</sub> , eV |                |                |
|----------------------------------------------------------------------------------------------------------------|---------------------|----------------|----------------|
|                                                                                                                | n = ∞ (pristine)    | n = 400        | n = 40         |
| OctMA <sub>n-1</sub> Pb <sub>n</sub> I <sub>3n+1</sub>                                                         | 1.608 (771 nm)      | 1.612 (769 nm) | 1.633 (759 nm) |
| OctFA <sub>n-1</sub> Pb <sub>n</sub> I <sub>3n+1</sub>                                                         | 1.535 (808 nm)      | 1.529 (811 nm) | 1.525 (813 nm) |
| Oct(Cs <sub>0.12</sub> FA <sub>0.88</sub> ) <sub>n-1</sub> Pb <sub>n</sub> I <sub>3n+1</sub>                   | 1.546 (802 nm)      | 1.550 (800 nm) | 1.555 (797 nm) |
| Oct(Cs <sub>0.1</sub> MA <sub>0.15</sub> FA <sub>0.75</sub> ) <sub>n-1</sub> Pb <sub>n</sub> I <sub>3n+1</sub> | 1.555 (797 nm)      | 1.552 (799 nm) | 1.545 (803 nm) |

**Table S3.** Average and the best (in brackets) values of the device parameters based on Oct(Cs<sub>0.12</sub>FA<sub>0.88</sub>)<sub>n-1</sub>Pb<sub>n</sub>I<sub>3n+1</sub> absorber layers with different OctI<sub>2</sub> contents.\*.

| Oct(Cs <sub>0.12</sub> FA <sub>0.88</sub> ) <sub>n-1</sub> Pb <sub>n</sub> I <sub>3n+1</sub> |                |                      |                                      |                 |                 |
|----------------------------------------------------------------------------------------------|----------------|----------------------|--------------------------------------|-----------------|-----------------|
| n =                                                                                          | Scan direction | V <sub>OC</sub> , mV | J <sub>SC</sub> , mA/cm <sup>2</sup> | FF, %           | PCE, %          |
| ∞ (pristine)                                                                                 | Forward        | 1041±15<br>(1056)    | 21.4±0.3 (21.7)                      | 72.4±3.2 (75.6) | 16.3±1.0 (17.3) |
|                                                                                              | Reverse        | 1045±16 (1061)       | 21.3±0.4 (21.7)                      | 73.1±3.9 (77.0) | 16.5±1.2 (17.7) |
| 400                                                                                          | Forward        | 1019±12 (1031)       | 20.9±0.4 (21.3)                      | 71.9±3.3 (75.2) | 15.3±1.2 (16.5) |
|                                                                                              | Reverse        | 1024±11 (1035)       | 21.0±0.3 (21.3)                      | 75.4±3.7 (79.1) | 16.2±1.2 (17.4) |
| 200                                                                                          | Forward        | 841±17 (858)         | 17.5±0.7<br>(18.2)                   | 50.8±5.0 (55.8) | 7.5±1.2 (8.7)   |
|                                                                                              | Reverse        | 862±18 (880)         | 17.0±0.6 (17.6)                      | 56.2±4.8 (61.0) | 8.3±1.1 (9.4)   |
| 40                                                                                           | Forward        | 679±21 (700)         | 10.2±0.9 (11.1)                      | 46.8±5.0 (51.8) | 3.4±0.7 (4.1)   |
|                                                                                              | Reverse        | 704±19 (723)         | 9.7±1.1 (10.8)                       | 55.2±4.9 (60.1) | 3.8±0.9 (4.7)   |

Notes: \* the J-V curves were measured in forward directions with a scan rate of 0.01 V/s.

## References

43. Hou, J.; Deng, F.; Wu, Q.; Yang, L.; Wu, J.; Li, X.; Zheng, Y.-Z.; Li, N.; Ding, H.; Tao, X. Ethylenediamine Chlorides Additive Assisting Formation of High-Quality Formamidinium-Caesium Perovskite Film with Low Trap Density for Efficient Solar Cells. *Journal of Power Sources* 2020, 449, 227484. <https://doi.org/10.1016/j.jpowsour.2019.227484>.
21. Lu, J.; Jiang, L.; Li, W.; Li, F.; Pai, N. K.; Scully, A. D.; Tsai, C.; Bach, U.; Simonov, A. N.; Cheng, Y.; Spiccia, L. Diammonium and Monoammonium Mixed-Organic-Cation Perovskites for High Performance Solar Cells with Improved Stability. *Advanced Energy Materials* 2017, 7(18). <https://doi.org/10.1002/aenm.201700444>.
44. Zhang, T.; Dar, M. I.; Li, G.; Xu, F.; Guo, N.; Grätzel, M.; Zhao, Y. Bication Lead Iodide 2D Perovskite Component to Stabilize Inorganic A-CsPbI<sub>3</sub> Perovskite Phase for High-Efficiency Solar Cells. *Science Advances* 2017, 3 (9). <https://doi.org/10.1126/sciadv.1700841>.
45. Jokar, E.; Chien, C.-H.; Fathi, A.; Rameez, M.; Chang, Y.-H.; Diao, E. W.-G. Slow Surface Passivation and Crystal Relaxation with Additives to Improve Device Performance and Durability for Tin-Based Perovskite Solar Cells. *Energy & Environmental Science* 2018, 11 (9), 2353–2362. <https://doi.org/10.1039/C8EE00956B>.
22. He, Q.; Worku, M.; Xu, L.; Zhou, C.; Lin, H.; Robb, A. J.; Hanson, K.; Xin, Y.; Ma, B. Facile Formation of 2D–3D Heterojunctions on Perovskite Thin Film Surfaces for Efficient Solar Cells. *ACS Applied Materials & Interfaces* 2020, 12 (1), 1159–1168. <https://doi.org/10.1021/acsami.9b17851>.
46. Zheng, H.; Liu, G.; Zhu, L.; Ye, J.; Zhang, X.; Alsaedi, A.; Hayat, T.; Pan, X.; Dai, S. The Effect of Hydrophobicity of Ammonium Salts on Stability of Quasi-2D Perovskite Materials in Moist Condition. *Advanced Energy Materials* 2018, 8 (21). <https://doi.org/10.1002/aenm.201800051>.
47. Wang, Y.; Liu, S.; Zeng, Q.; Wang, R.; Qin, W.; Cao, H.; Yang, L.; Li, L.; Yin, S.; Zhang, F. Enhanced Performance and Stability of Inverted Planar Perovskite Solar Cells by Incorporating 1,6-Diaminohexane Dihydrochloride Additive. *Solar Energy Materials and Solar Cells* 2018, 188, 140–148. <https://doi.org/10.1016/j.solmat.2018.07.031>.
48. Luo, W.; Wu, C.; Wang, D.; Zhang, Y.; Zhang, Z.; Qi, X.; Zhu, N.; Guo, X.; Qu, B.; Xiao, L.; Chen, Z. Efficient and Stable Perovskite Solar Cell with High Open-Circuit Voltage by Dimensional Interface Modification. *ACS Applied Materials & Interfaces* 2019, 11 (9), 9149–9155. <https://doi.org/10.1021/acsami.8b22040>.
49. Zhao, T.; Chueh, C.-C.; Chen, Q.; Rajagopal, A.; Jen, A. K.-Y. Defect Passivation of Organic–Inorganic Hybrid Perovskites by Diammonium Iodide toward High-Performance Photovoltaic Devices. *ACS Energy Letters* 2016, 1 (4), 757–763. <https://doi.org/10.1021/acsenenergylett.6b00327>.
50. Li, P.; Zhang, Y.; Liang, C.; Xing, G.; Liu, X.; Li, F.; Liu, X.; Hu, X.; Shao, G.; Song, Y. Phase Pure 2D Perovskite for High-Performance 2D–3D Heterostructured Perovskite Solar Cells. *Advanced Materials* 2018, 30 (52). <https://doi.org/10.1002/adma.201805323>.
51. Xin, D.; Tie, S.; Yuan, R.; Zheng, X.; Zhu, J.; Zhang, W.-H. Defect Passivation in Hybrid Perovskite Solar Cells by Tailoring the Electron Density Distribution in Passivation Molecules. *ACS Applied Materials & Interfaces* 2019, 11 (47), 44233–44240. <https://doi.org/10.1021/acsami.9b15166>.
52. Chen, J.; Kim, S.-G.; Ren, X.; Jung, H. S.; Park, N.-G. Effect of Bidentate and Tridentate Additives on the Photovoltaic Performance and Stability of Perovskite Solar Cells. *Journal of Materials Chemistry A* 2019, 7 (9), 4977–4987. <https://doi.org/10.1039/C8TA11977E>.
53. Lee, M.-S.; Sarwar, S.; Park, S.; Asmat, U.; Thuy, D. T.; Han, C.; Ahn, S.; Jeong, I.; Hong, S. Efficient Defect Passivation of Perovskite Solar Cells via Stitching of an Organic Bidentate Molecule. *Sustainable Energy & Fuels* 2020, 4 (7), 3318–3325. <https://doi.org/10.1039/C9SE01041F>.
54. Salado, M.; Jodlowski, A. D.; Roldan-Carmona, C.; de Miguel, G.; Kazim, S.; Nazeeruddin, M. K.; Ahmad, S. Surface Passivation of Perovskite Layers Using Heterocyclic Halides: Improved Photovoltaic Properties and Intrinsic Stability. *Nano Energy* 2018, 50, 220–228. <https://doi.org/10.1016/j.nanoen.2018.05.035>.

15. 55. Shen, D.; Wu, W.; Li, Y.; Abate, A.; Wei, M. 2-Methylimidazole as an Interlayer for the Enhancement of the Open-Circuit Voltage in Perovskite Solar Cells. *Journal of Power Sources* 2020, 450, 227714. <https://doi.org/10.1016/j.jpowsour.2020.227714>.
16. 30. Mao, L.; Ke, W.; Pedesseau, L.; Wu, Y.; Katan, C.; Even, J.; Wasielewski, M. R.; Stoumpos, C. C.; Kanatzidis, M. G. Hybrid Dion–Jacobson 2D Lead Iodide Perovskites. *Journal of the American Chemical Society* 2018, 140 (10), 3775–3783. <https://doi.org/10.1021/jacs.8b00542>.
17. 56. Ke, W.; Mao, L.; Stoumpos, C. C.; Hoffman, J.; Spanopoulos, I.; Mohite, A. D.; Kanatzidis, M. G. Compositional and Solvent Engineering in Dion–Jacobson 2D Perovskites Boosts Solar Cell Efficiency and Stability. *Advanced Energy Materials* 2019, 9 (10). <https://doi.org/10.1002/aenm.201803384>.
18. 57. Wu, H.; Lian, X.; Tian, S.; Zhang, Y.; Qin, M.; Zhang, Y.; Wang, F.; Lu, X.; Wu, G.; Chen, H. Additive-Assisted Hot-Casting Free Fabrication of Dion–Jacobson 2D Perovskite Solar Cell with Efficiency Beyond 16%. *Solar RRL* 2020, 4 (7). <https://doi.org/10.1002/solr.202000087>.
19. 58. Li, X.; Ke, W.; Traoré, B.; Guo, P.; Hadar, I.; Kepenekian, M.; Even, J.; Katan, C.; Stoumpos, C. C.; Schaller, R. D.; Kanatzidis, M. G. Two-Dimensional Dion–Jacobson Hybrid Lead Iodide Perovskites with Aromatic Diammonium Cations. *Journal of the American Chemical Society* 2019, 141 (32), 12880–12890. <https://doi.org/10.1021/jacs.9b06398>.
20. 59. Lu, D.; Lv, G.; Xu, Z.; Dong, Y.; Ji, X.; Liu, Y. Thiophene-Based Two-Dimensional Dion–Jacobson Perovskite Solar Cells with over 15% Efficiency. *Journal of the American Chemical Society* 2020, 142 (25), 11114–11122. <https://doi.org/10.1021/jacs.0c03363>.
21. 60. Zhao, W.; Dong, Q.; Zhang, J.; Wang, S.; Chen, M.; Zhao, C.; Hu, M.; Jin, S.; Padture, N. P.; Shi, Y. Asymmetric Alkyl Diamine Based Dion–Jacobson Low-Dimensional Perovskite Solar Cells with Efficiency Exceeding 15%. *Journal of Materials Chemistry A* 2020, 8 (19), 9919–9926. <https://doi.org/10.1039/D0TA02706E>.
22. 31. Ahmad, S.; Fu, P.; Yu, S.; Yang, Q.; Liu, X.; Wang, X.; Wang, X.; Guo, X.; Li, C. Dion–Jacobson Phase 2D Layered Perovskites for Solar Cells with Ultrahigh Stability. *Joule* 2019, 3(3), 794–806. <https://doi.org/10.1016/j.joule.2018.11.026>.
23. 32. Ma, C.; Shen, D.; Ng, T.; Lo, M.; Lee, C. 2D Perovskites with Short Interlayer Distance for High-Performance Solar Cell Application. *Advanced Materials* 2018, 30 (22). <https://doi.org/10.1002/adma.201800710>.
24. 29. Li, F.; Zhang, J.; Jo, S.; Qin, M.; Li, Z.; Liu, T.; Lu, X.; Zhu, Z.; Jen, A. K. -Y. Vertical Orientated Dion–Jacobson Quasi-2D Perovskite Film with Improved Photovoltaic Performance and Stability. *Small Methods* 2020, 4 (5). <https://doi.org/10.1002/smtd.201900831>.
25. 61. Zheng, Y.; Niu, T.; Qiu, J.; Chao, L.; Li, B.; Yang, Y.; Li, Q.; Lin, C.; Gao, X.; Zhang, C.; Xia, Y.; Chen, Y.; Huang, W. Oriented and Uniform Distribution of Dion–Jacobson Phase Perovskites Controlled by Quantum Well Barrier Thickness. *Solar RRL* 2019, 3 (9). <https://doi.org/10.1002/solr.201900090>.
26. 42. Safdari, M.; Svensson, P. H.; Hoang, M. T.; Oh, I.; Kloo, L.; Gardner, J. M. Layered 2D Alkyldiammonium Lead Iodide Perovskites: Synthesis, Characterization, and Use in Solar Cells. *Journal of Materials Chemistry A* 2016, 4 (40), 15638–15646. <https://doi.org/10.1039/C6TA05055G>.
27. 62. Safdari, M.; Phuyal, D.; Philippe, B.; Svensson, P. H.; Butorin, S. M.; Kvashnina, K. O.; Rensmo, H.; Kloo, L.; Gardner, J. M. Impact of Synthetic Routes on the Structural and Physical Properties of Butyl-1,4-Diammonium Lead Iodide Semiconductors. *Journal of Materials Chemistry A* 2017, 5 (23), 11730–11738. <https://doi.org/10.1039/C6TA10123B>.
28. 24. Niu, T.; Ren, H.; Wu, B.; Xia, Y.; Xie, X.; Yang, Y.; Gao, X.; Chen, Y.; Huang, W. Reduced-Dimensional Perovskite Enabled by Organic Diamine for Efficient Photovoltaics. *The Journal of Physical Chemistry Letters* 2019, 10 (10), 2349–2356. <https://doi.org/10.1021/acs.jpclett.9b00750>.
29. 63. Zhao, X.; Liu, T.; Kaplan, A. B.; Yao, C.; Loo, Y.-L. Accessing Highly Oriented Two-Dimensional Perovskite Films via Solvent-Vapor Annealing for Efficient and Stable Solar Cells. *Nano Letters* 2020, 20 (12), 8880–8889. <https://doi.org/10.1021/acs.nanolett.0c03914>.
30. 64. Li, P.; Liu, X.; Zhang, Y.; Liang, C.; Chen, G.; Li, F.; Su, M.; Xing, G.; Tao, X.; Song, Y. Low-Dimensional Dion–Jacobson-Phase Lead-Free Perovskites for High-Performance Photovoltaics with Improved Stability. *Angewandte Chemie International Edition* 2020, 59(17), 6909–6914. <https://doi.org/10.1002/anie.202000460>.
31. 65. Wang, H.; Chan, C. C. S.; Chu, M.; Xie, J.; Zhao, S.; Guo, X.; Miao, Q.; Wong, K. S.; Yan, K.; Xu, J. Interlayer Cross-Linked 2D Perovskite Solar Cell with Uniform Phase Distribution and Increased Exciton Coupling. *Solar RRL* 2020, 4 (4). <https://doi.org/10.1002/solr.201900578>.
32. 66. Jin, L.; Ren, N.; Wang, P.; Li, R.; Xue, Q.; Huang, F.; Zhang, X.; Zhao, Y.; Zhang, X. Secondary Anti-Solvent Treatment for Efficient 2D Dion–Jacobson Perovskite Solar Cells. *Small* 2023, 19 (3). <https://doi.org/10.1002/sml.202205088>.
33. 40. Su, P.; Bai, L.; Bi, H.; Liu, B.; Chen, S.; Lee, D.; Yang, H.; Chen, C.; Zang, Z.; Chen, J. Interfacial Gradient Energy Band Alignment Modulation via Ion Exchange Reaction toward Efficient and Stable Methylammonium-Free Dion–Jacobson Quasi-2D Perovskite Solar Cells. *Journal of Power Sources* 2021, 506, 230213. <https://doi.org/10.1016/j.jpowsour.2021.230213>.
34. 67. Lv, G.; Li, L.; Lu, D.; Xu, Z.; Dong, Y.; Li, Q.; Chang, Z.; Yin, W.-J.; Liu, Y. Multiple-Noncovalent-Interaction-Stabilized Layered Dion–Jacobson Perovskite for Efficient Solar Cells. *Nano Letters* 2021, 21 (13), 5788–5797. <https://doi.org/10.1021/acs.nanolett.1c01505>.
35. 36. Wang, H.; Qin, Z.; Xie, J.; Zhao, S.; Liu, K.; Guo, X.; Li, G.; Lu, X.; Yan, K.; Xu, J. Efficient Slantwise Aligned Dion–Jacobson Phase Perovskite Solar Cells Based on Trans-1,4-Cyclohexanediamine. *Small* 2020, 16 (42). <https://doi.org/10.1002/sml.202003098>.
36. 68. Xu, Z.; Lu, D.; Dong, X.; Chen, M.; Fu, Q.; Liu, Y. Highly Efficient and Stable Dion–Jacobson Perovskite Solar Cells Enabled by Extended  $\pi$ -Conjugation of Organic Spacer. *Advanced Materials* 2021, 33 (51). <https://doi.org/10.1002/adma.202105083>.

37. 25. Wang, J.; Lin, D.; Chen, Y.; Luo, S.; Ke, L.; Ren, X.; Cui, S.; Zhang, L.; Li, Z.; Meng, K.; Lin, Y.; Ding, L.; Yuan, Y. Suppressing the Excessive Solvated Phase for Dion–Jacobson Perovskites with Improved Crystallinity and Vertical Orientation. *Solar RRL* 2020, 4 (11). <https://doi.org/10.1002/solr.202000371>.
38. 38. Li, Y.; Milić, J. V.; Ummadisingu, A.; Seo, J.-Y.; Im, J.-H.; Kim, H.-S.; Liu, Y.; Dar, M. I.; Zakeeruddin, S. M.; Wang, P.; Hagfeldt, A.; Grätzel, M. Bifunctional Organic Spacers for Formamidinium-Based Hybrid Dion–Jacobson Two-Dimensional Perovskite Solar Cells. *Nano Letters* 2019, 19 (1), 150–157. <https://doi.org/10.1021/acs.nanolett.8b03552>.
39. 39. Cohen, B.-E.; Li, Y.; Meng, Q.; Etgar, L. Dion–Jacobson Two-Dimensional Perovskite Solar Cells Based on Benzene Dimethan ammonium Cation. *Nano Letters* 2019, 19 (4), 2588–2597. <https://doi.org/10.1021/acs.nanolett.9b00387>.
40. 69. Chen, Z.; Liu, M.; Li, Z.; Shi, T.; Yang, Y.; Yip, H.-L.; Cao, Y. Stable Sn/Pb-Based Perovskite Solar Cells with a Coherent 2D/3D Interface. *iScience* 2018, 9, 337–346. <https://doi.org/10.1016/j.isci.2018.11.003>.
